# Supplementary material
Source: PubMed Central journal article supplement (PMC3123794)

# Supplemental Fig. 1

A

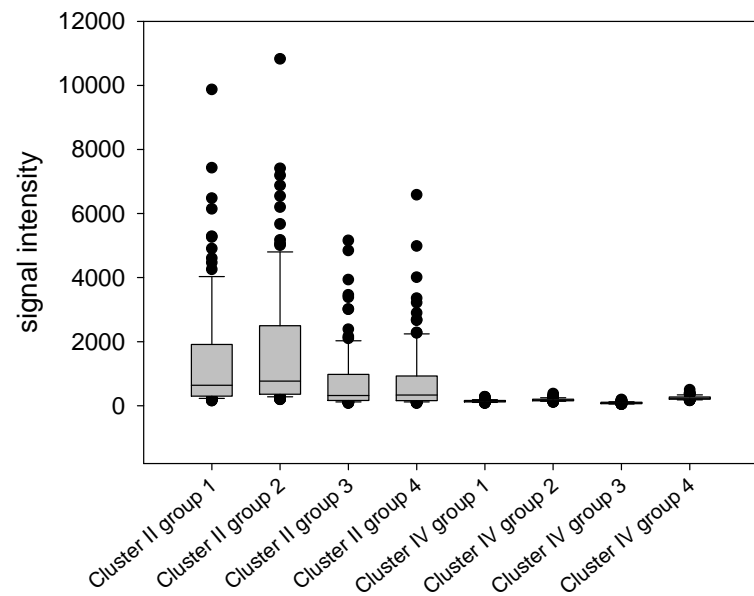

B

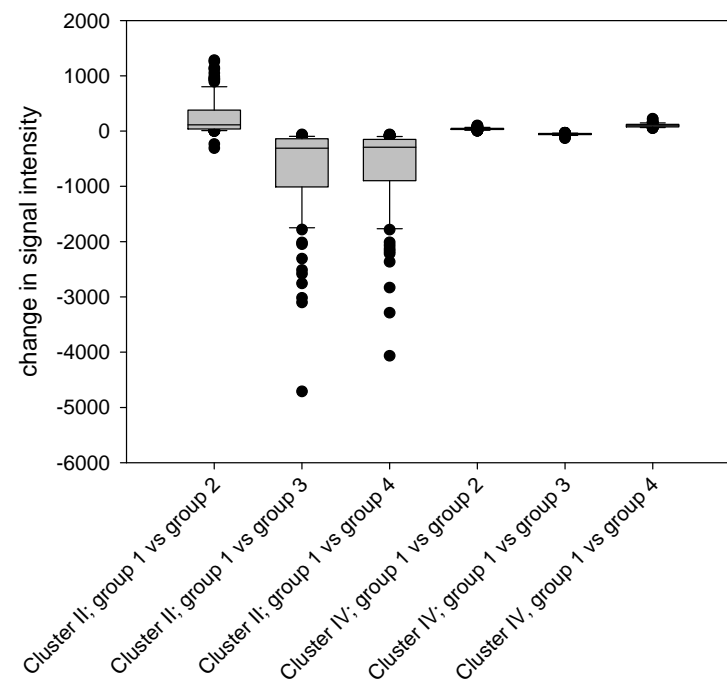

|      |        |         |         |      |        |       |
|------|--------|---------|---------|------|--------|-------|
| Min: | -309   | -4712.3 | -4068.0 | 4.54 | -129.8 | 52.76 |
| Max: | 1282.2 | -61.32  | -60.36  | 99.3 | 30.0   | 221.9 |

Supplement: mmc1.pdf [file mmc1.pdf]
